# Supplementary material
Source: PubMed Central journal article supplement (PMC5512335)
Supplement: Supp_Fig1.pdf [file Supp_Fig1.pdf]

## Supplementary Data

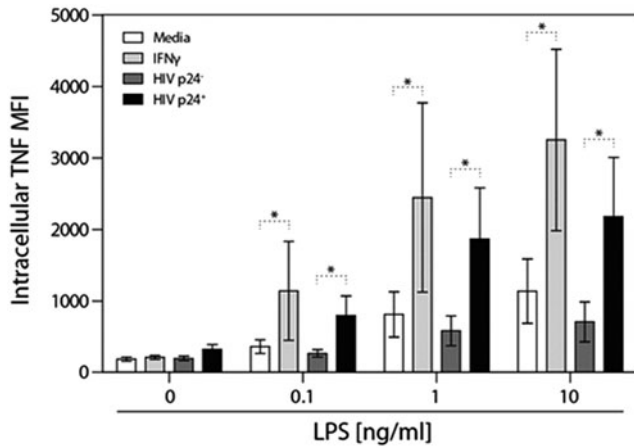

**SUPPLEMENTARY FIG. S1.** Low concentrations of LPS enhances TNF expression in IFN $\gamma$ - or HIV-1-primed MDM. MDM stimulated with IFN $\gamma$  for 18 h or infected with HIV-1 for 7 days were left untreated or stimulated with different concentrations of LPS. Intracellular p24 and TNF were measured by flow cytometry. Bars represent mean  $\pm$  SEM mean fluorescence intensity of TNF in uninfected cells and infected cells gated on either p24-negative or p24-positive populations; \* $p < .05$  by two-way ANOVA with Bonferroni correction. MDM, monocyte-derived macrophages.
